# Supplementary material
Source: MDPI journal article supplement (https://www.mdpi.com/2297-8739/10/11/563)
Supplement: s1 [file s1]

# Enhancing Trace Metal Extraction from Wastewater: Magnetic Activated Carbon as a High-Performance Sorbent for Inductively Coupled Plasma Optical Emission Spectrometry Analysis

Sergio J. Abellán-Martín<sup>a</sup>, David Villalgordo-Hernández<sup>b</sup>, Miguel Ángel Aguirre<sup>a</sup>, Enrique V. Ramos-Fernández<sup>b</sup>, Javier Narciso<sup>b,c</sup> and Antonio Canals<sup>a</sup>

<sup>a</sup>Department of Analytical Chemistry and Food Science and University Institute of Materials, Faculty of Science, University of Alicante, P.O. Box 99, 03080, Alicante, Spain.

<sup>b</sup>Department of Inorganic Chemistry and University Institute of Materials, Faculty of Science, University of Alicante, P.O. Box 99, 03080, Alicante, Spain.

<sup>c</sup>Instituto de Investigación Sanitaria y Biomédica de Alicante (ISABIAL), Alicante, Spain.

## Figures

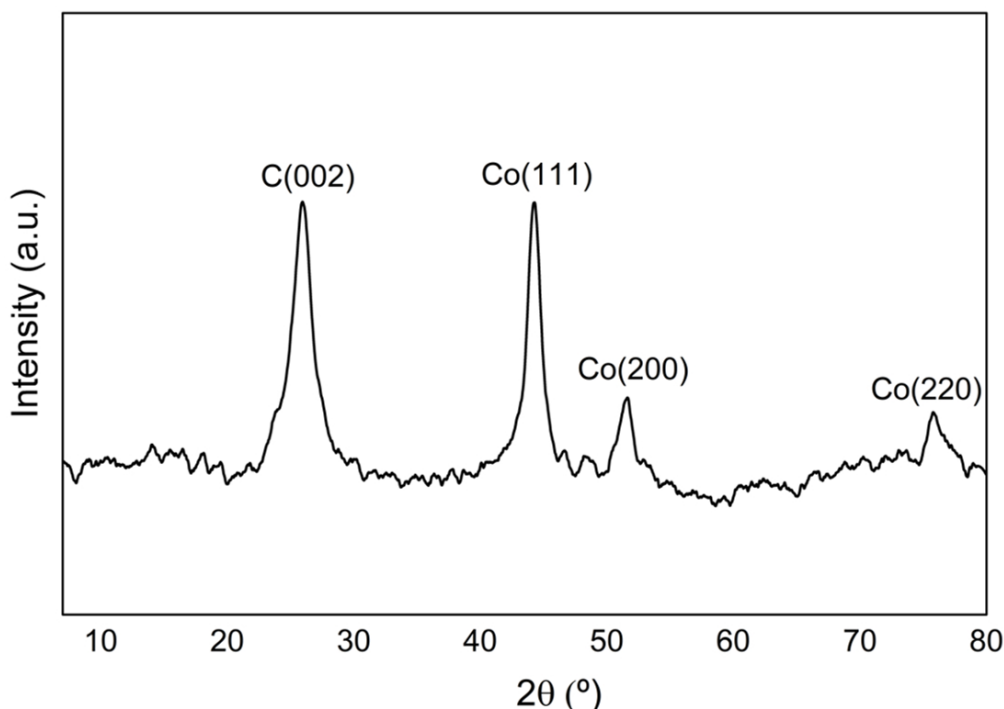

**Figure S1.** XRD pattern of ZIF67c\_900\_1 registered between 5° and 80° with an angular step of 0.05° and a three second step time.

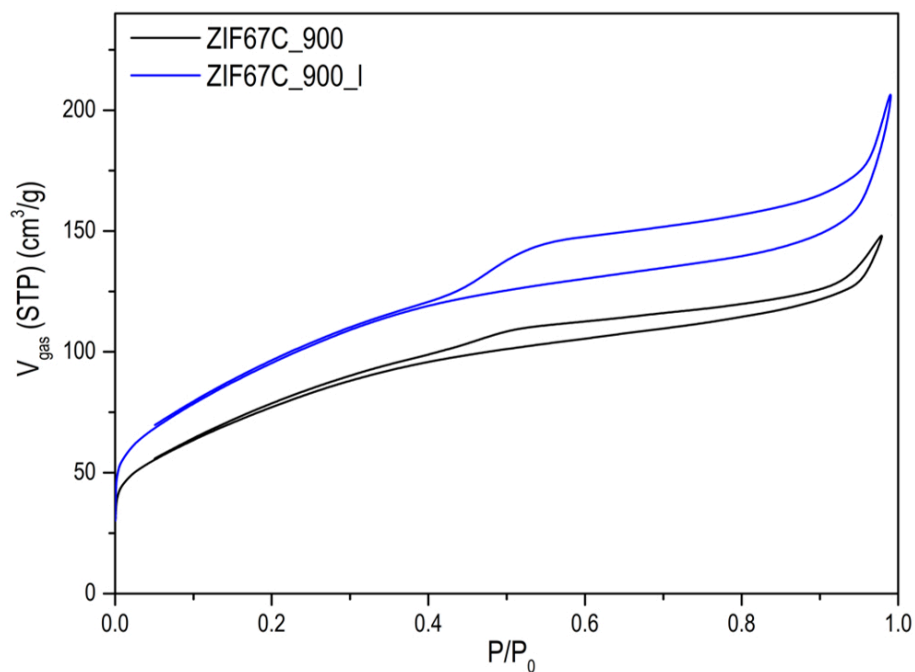

**Figure S2.**  $\text{N}_2$  adsorption isotherm obtained at  $-196^\circ\text{C}$  of the original carbon (i.e., ZIF67c\_900) and the washed material ZIF67c\_900\_I after outgassing the sample at  $150^\circ\text{C}$  during 4 hours.

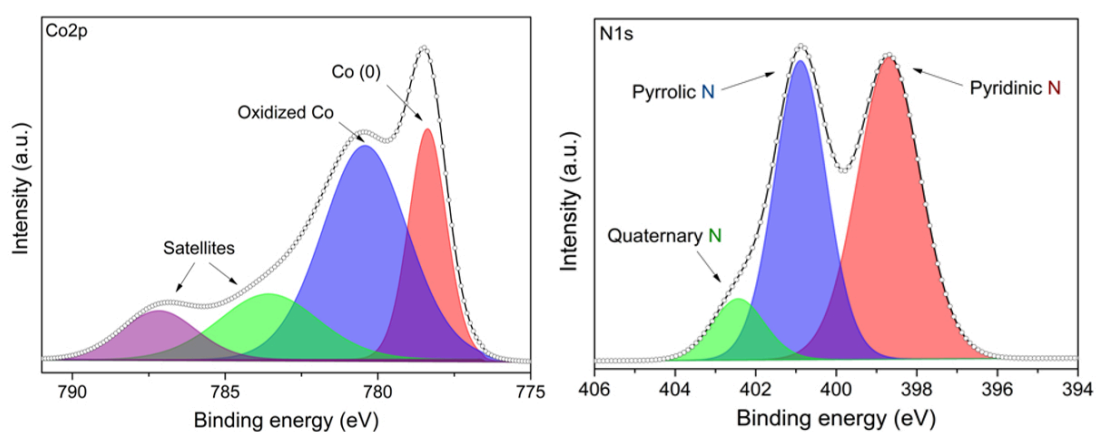

**Figure S3.** XPS spectra of cobalt and nitrogen in ZIF67c\_900\_I.  $\text{Hv}$ :1253.6 eV, pass energy of 50 eV and background pressure of  $5 \cdot 10^{-7}$  Pa.

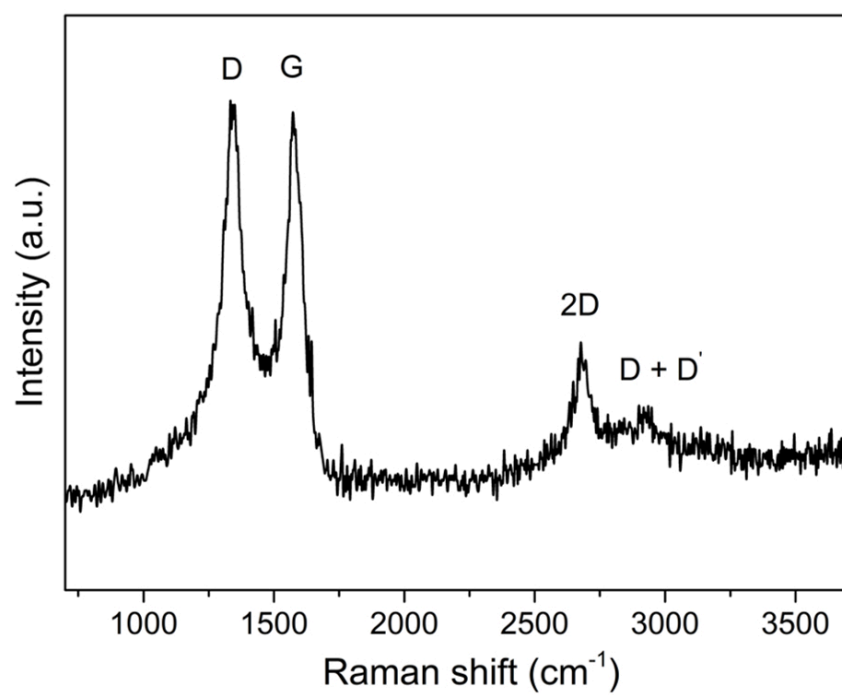

**Figure S4.** Raman spectrum of ZIF67c\_900\_1 obtained using a 633 nm He laser.

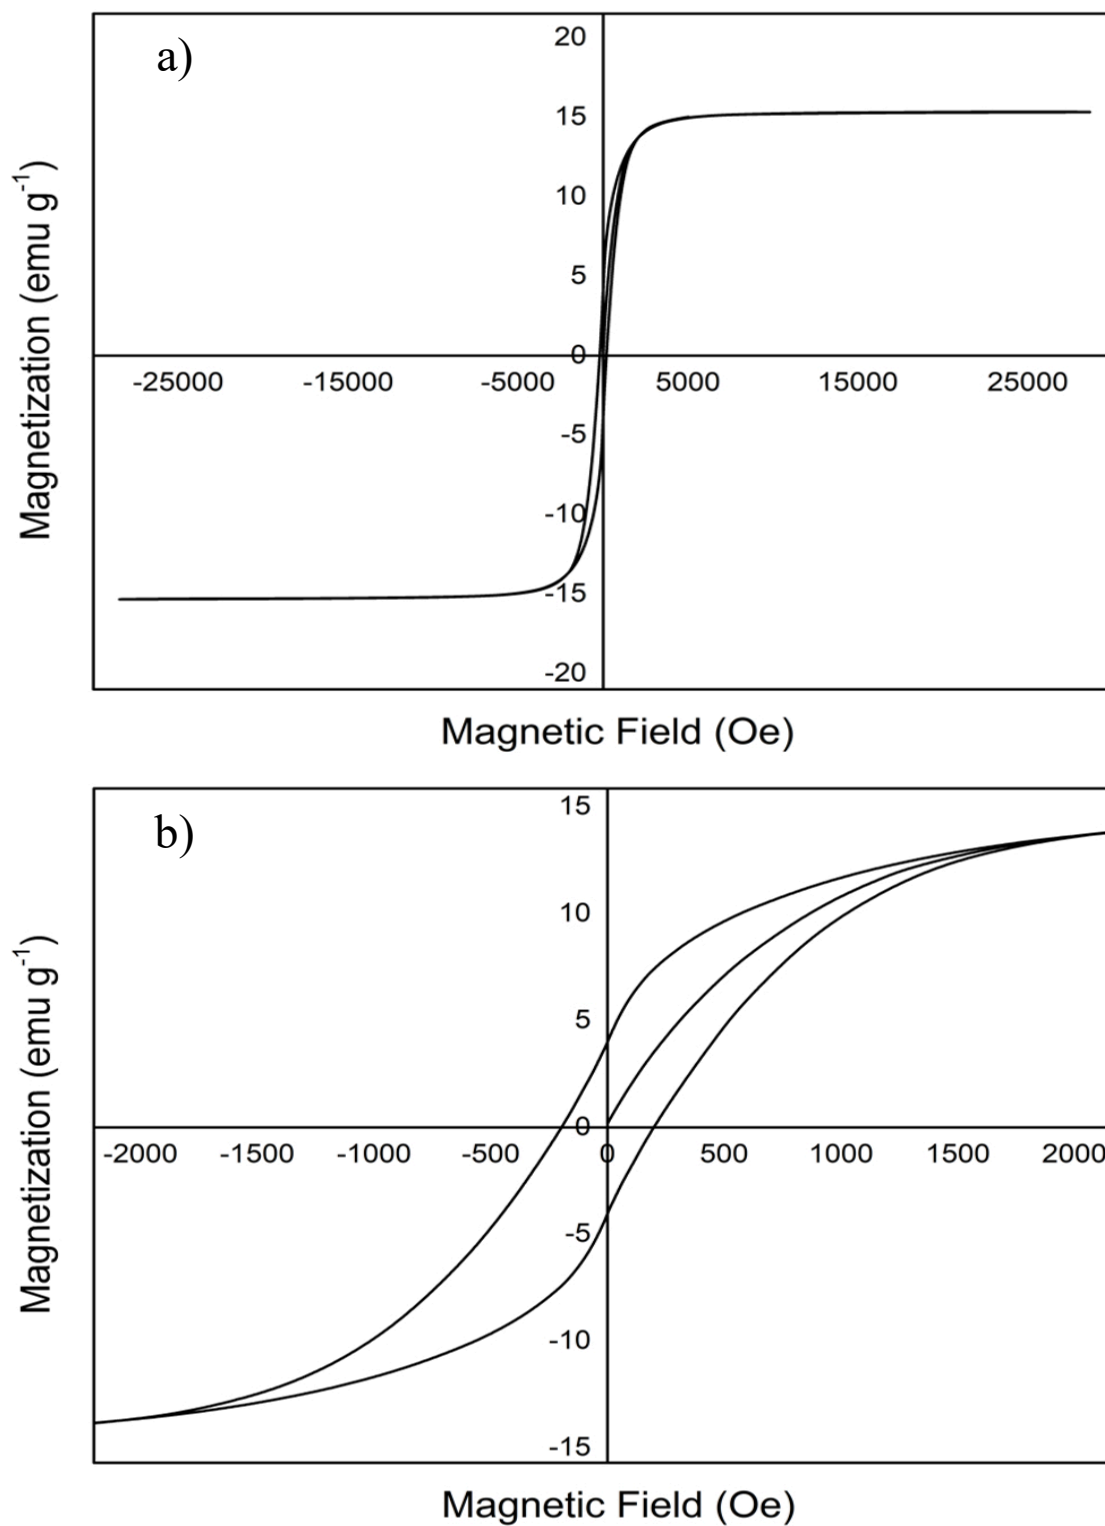

**Figure S5.** Magnetization curve of ZIF67c\_900\_1 at 300K in a magnetic field from -30 to 30 kOe. a) representation of the magnetization curve (i.e., X axis from

-30 to 30 kOe) b) amplified representation of the magnetization curve (i.e., X axis from -2 to 2 kOe).

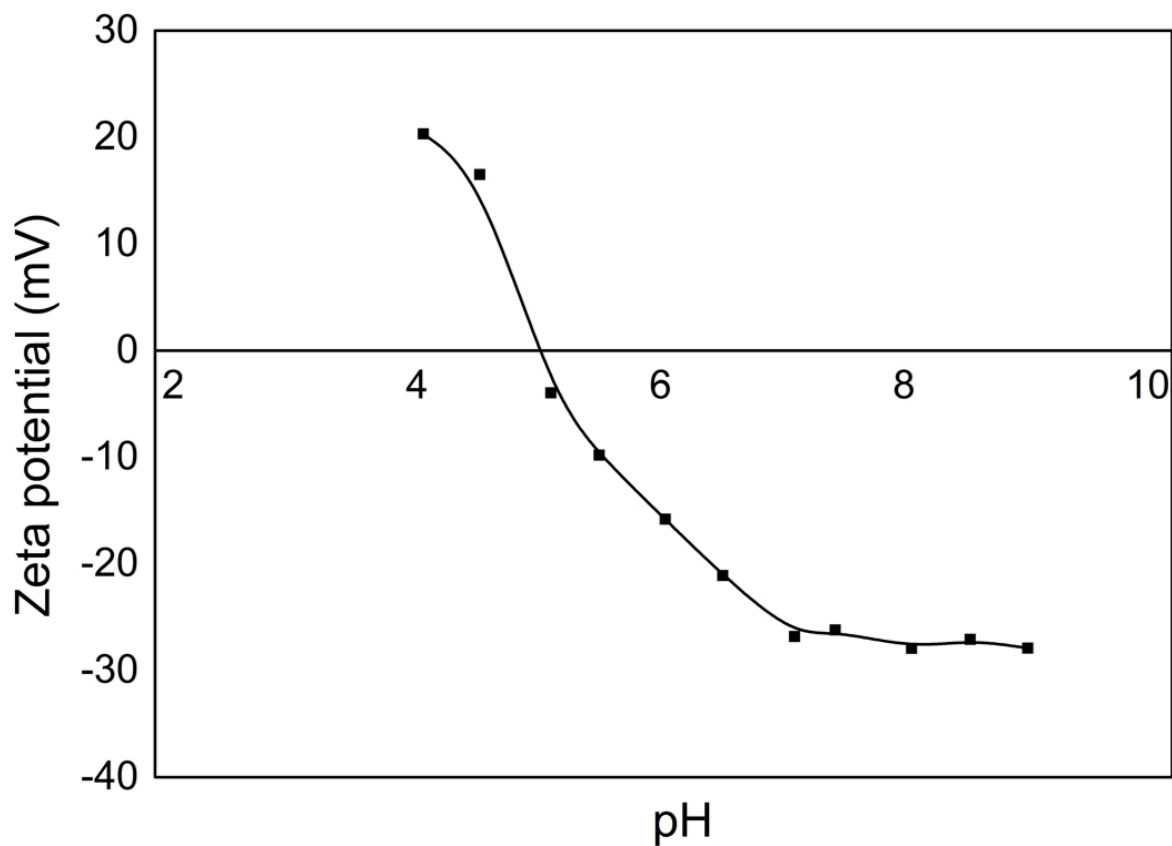

**Figure S6.** Zeta potential of ZIF67c\_900\_1/DDTC complex as function of the pH value. Complexing agent concentration: 0.5 %.

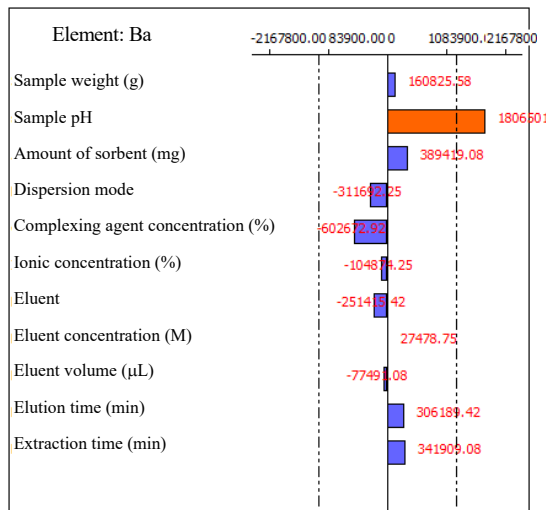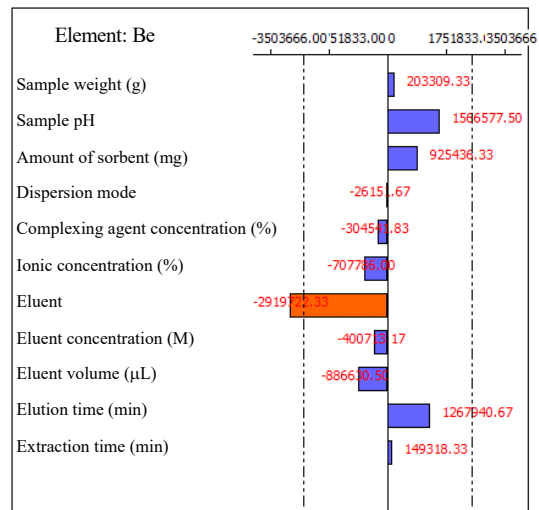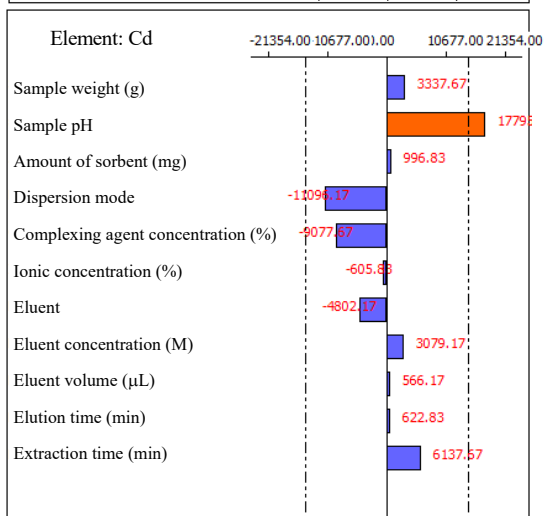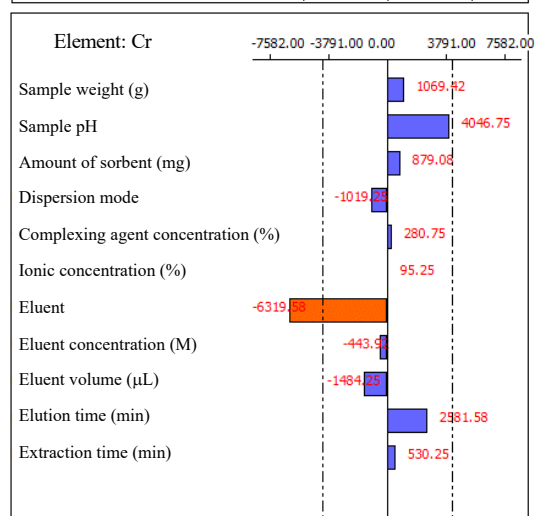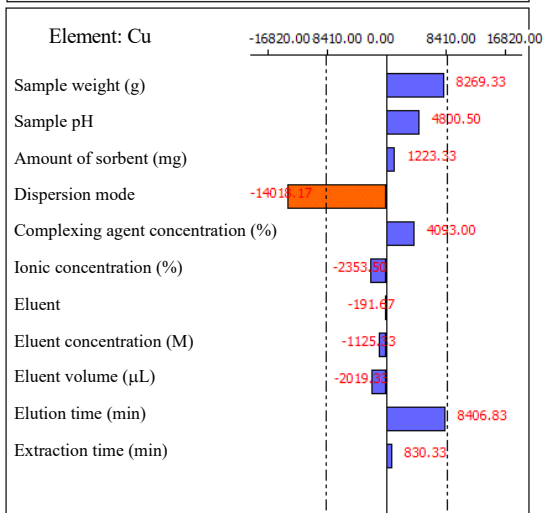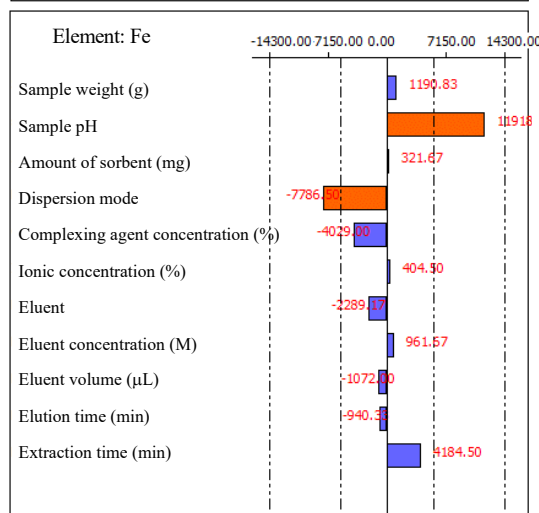

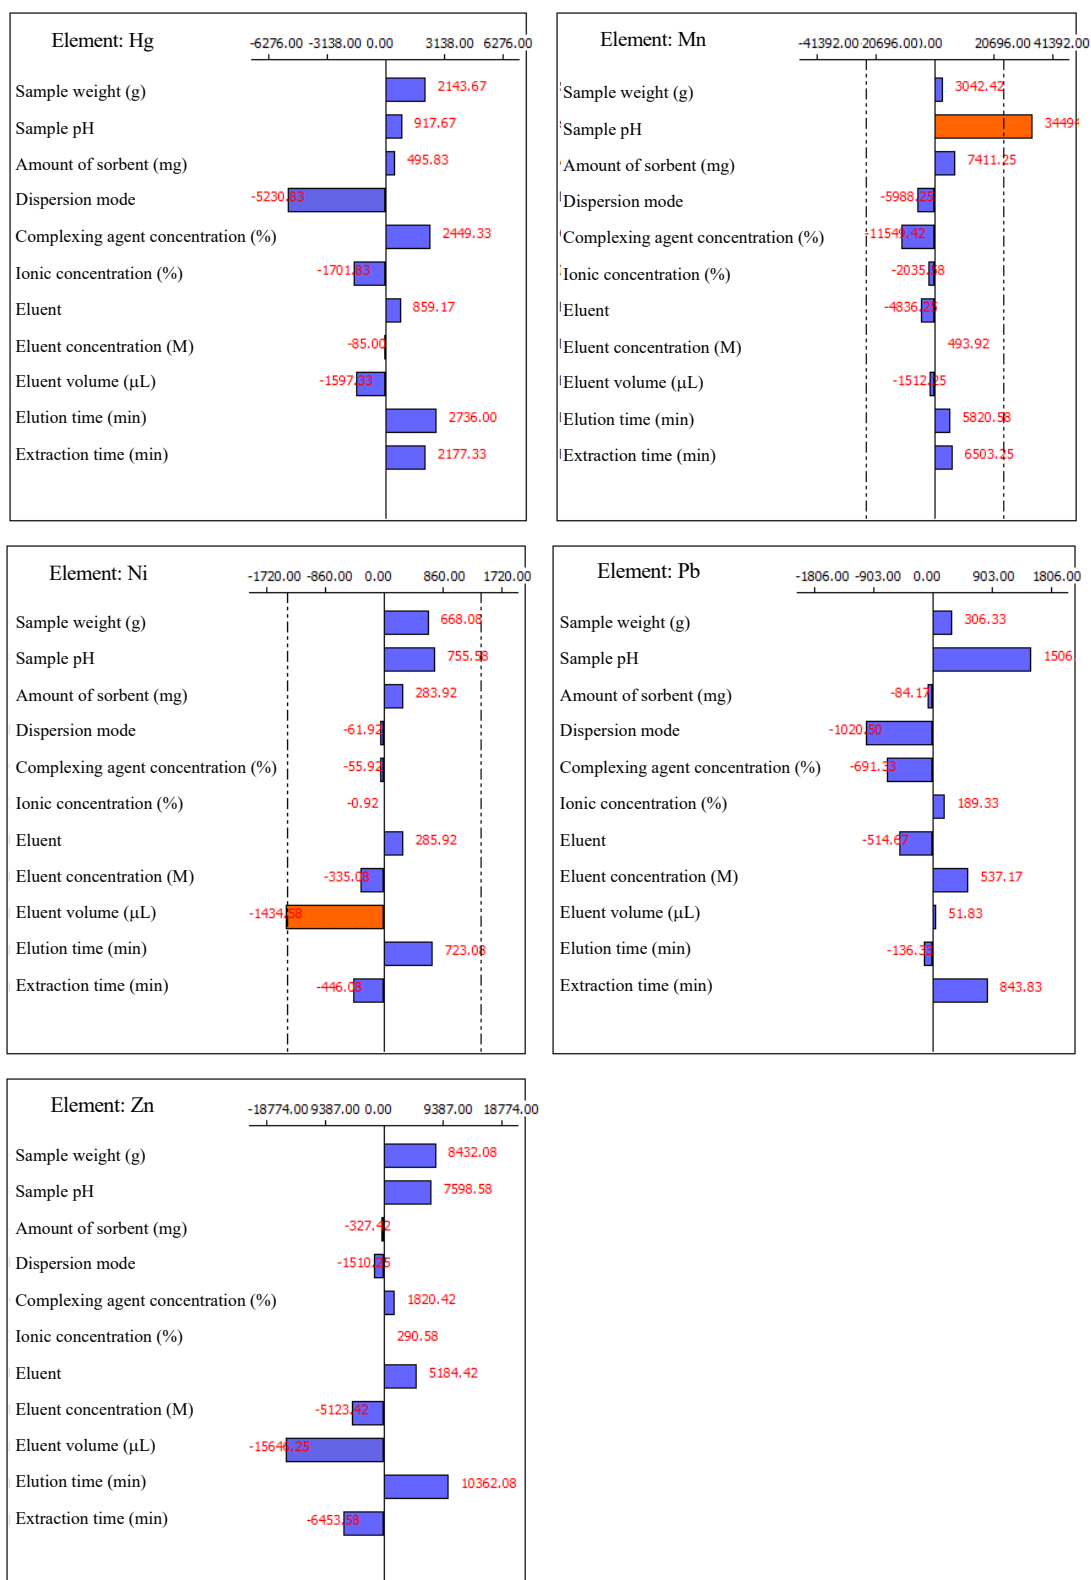

**Figure S7.** Pareto charts obtained in the screening study of the factors affecting the MDSPE. Orange means significant effect while blue means non-significant effect on MDSPE.

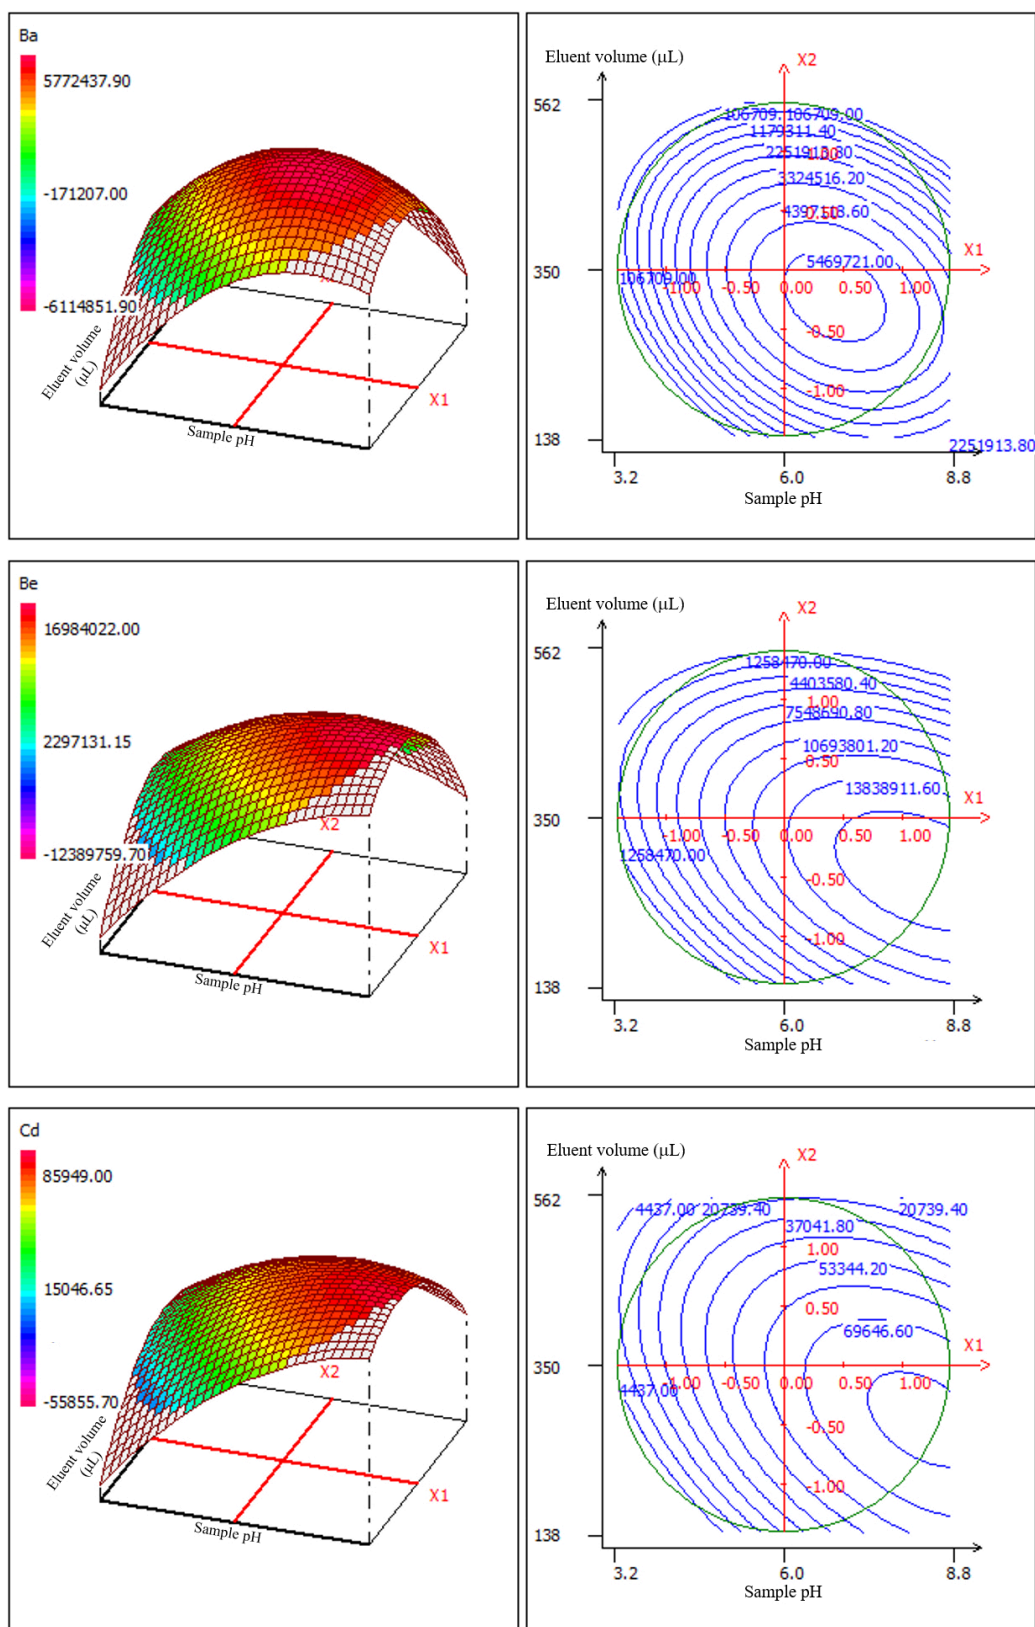



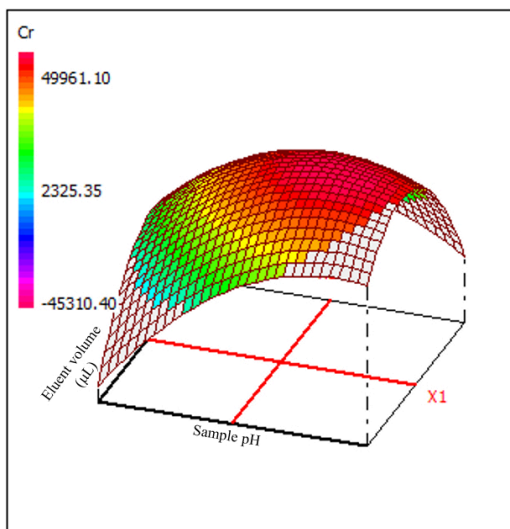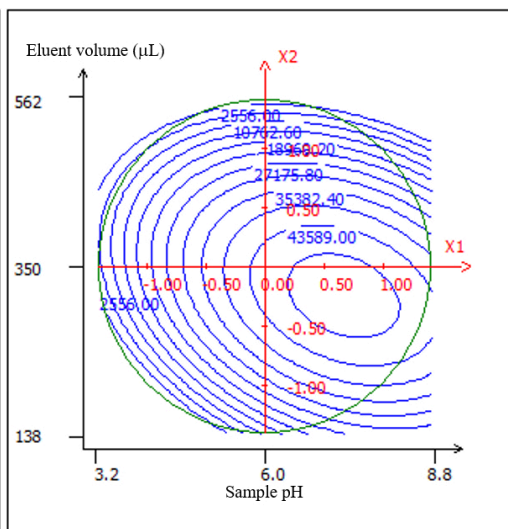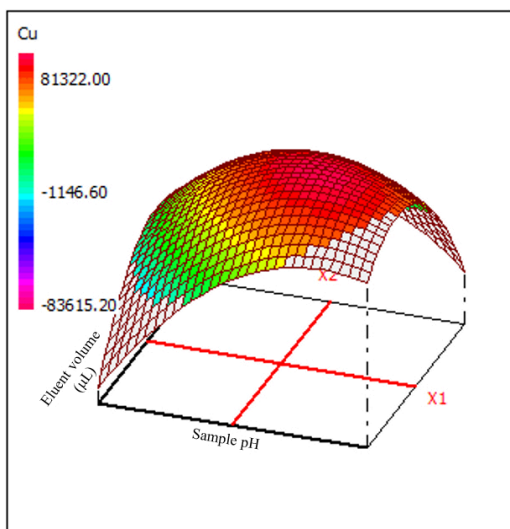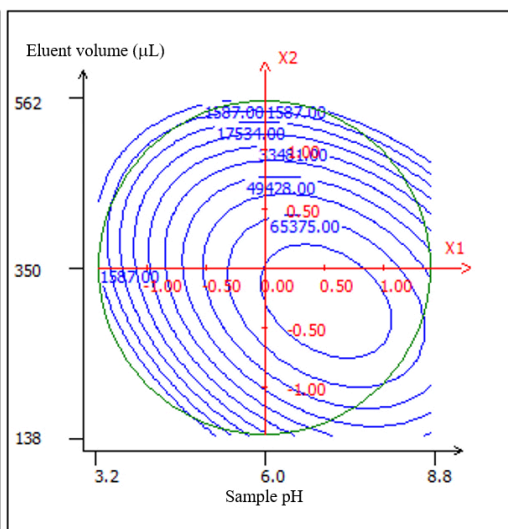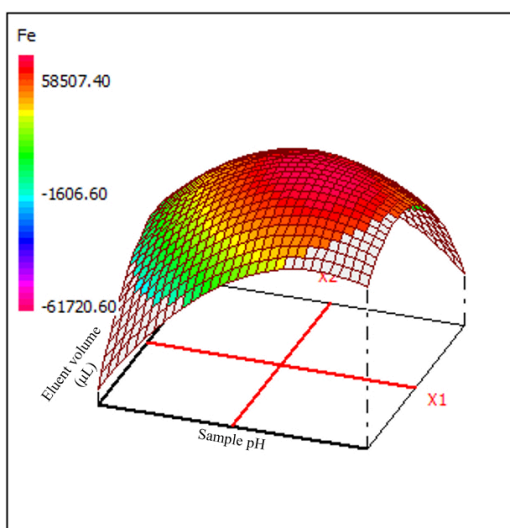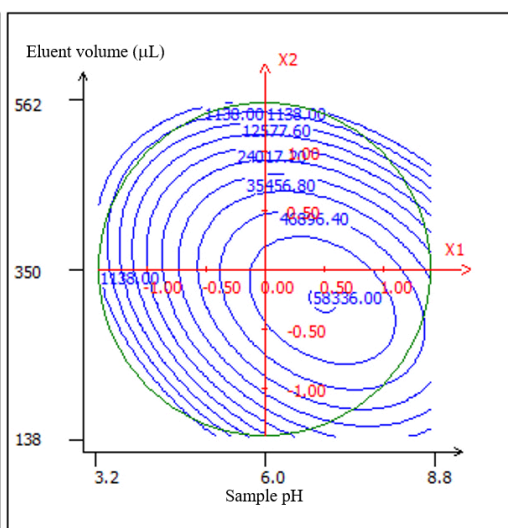

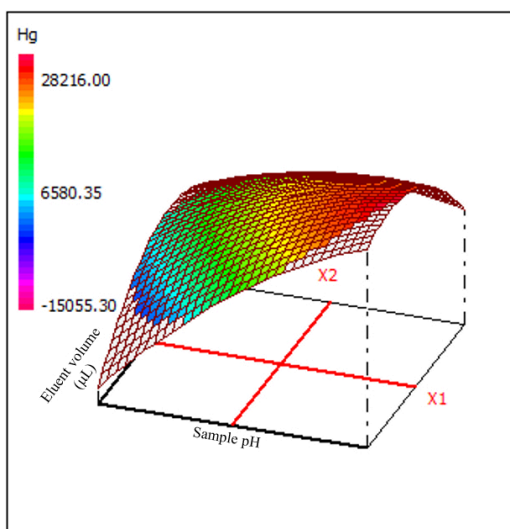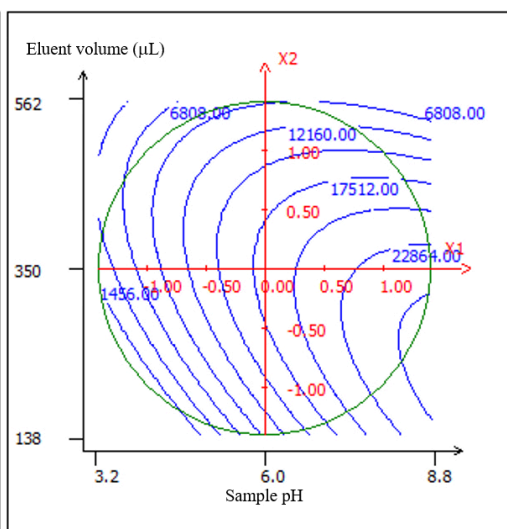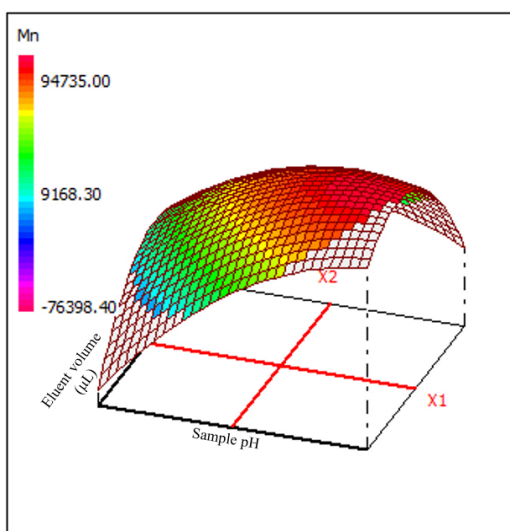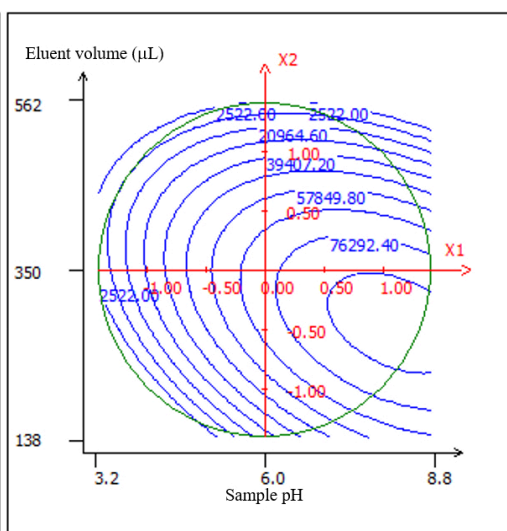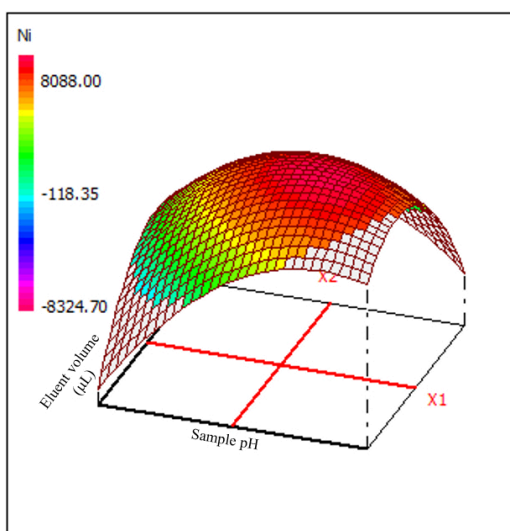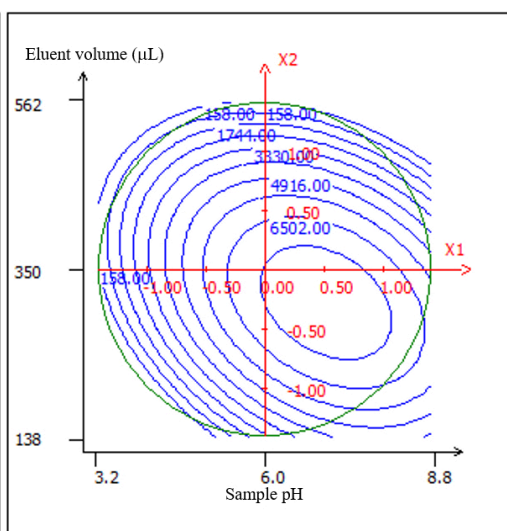

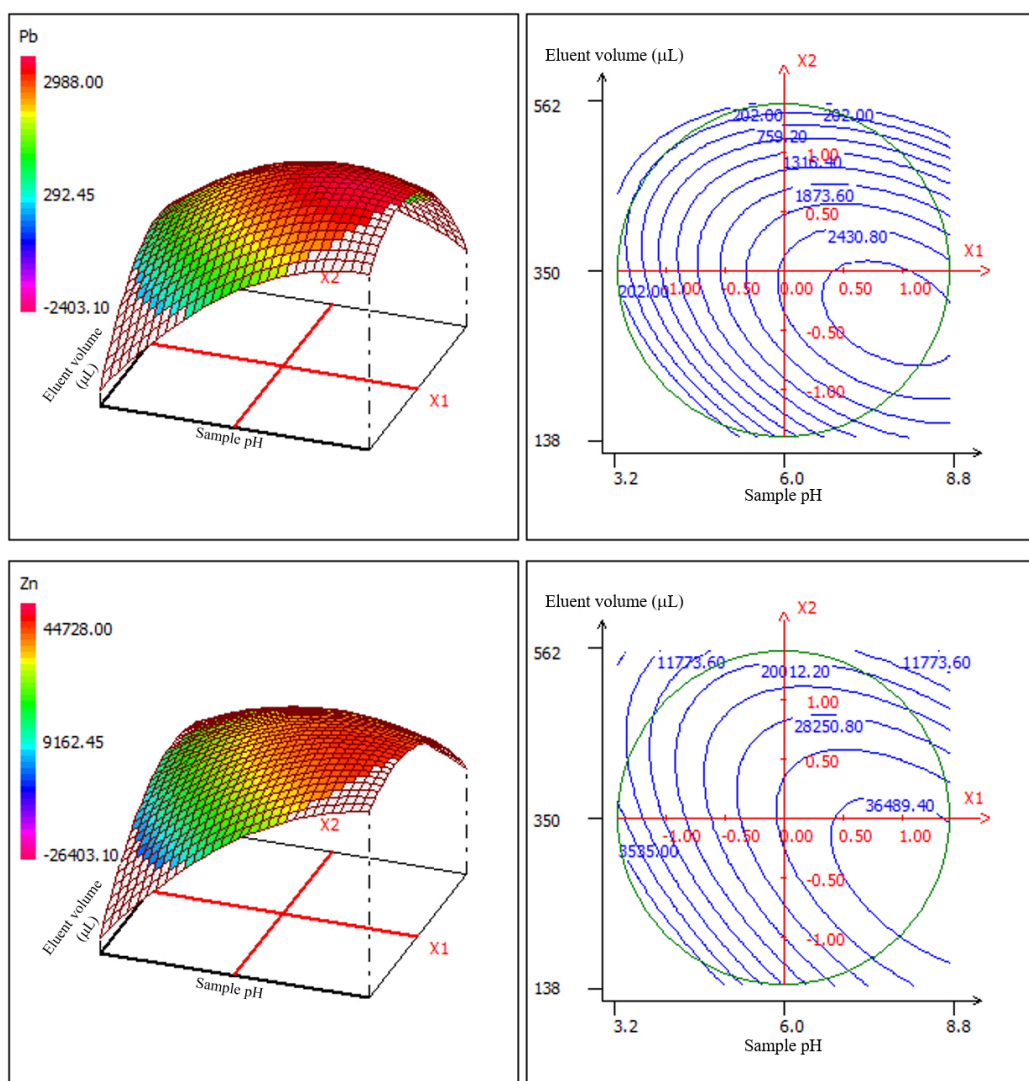

**Figure S8.** Response surface from CCD of sample pH and eluent volume for each analyte evaluated. Experimental fixed conditions: (i) sample weight, 10 g; (ii) amount of sorbent, 10 mg; (iii) dispersion mode, vortex; (iv) complexing agent concentration, 0.5 %; (v) ionic concentration, 0 %; (vi) eluent, HCl; (vii) eluent concentration, 0.5 M; (viii) extraction time, 3 min and (ix) elution time, 3 min.

## Tables

**Table S1.** Operational parameters employed in Agilent 720 ICP OES.

| Instrumental parameter                         | Value              |
|------------------------------------------------|--------------------|
| RF applied power (kW)                          | 1.4                |
| Plasma gas flow rate (L min <sup>-1</sup> )    | 15                 |
| Auxiliary gas flow rate (L min <sup>-1</sup> ) | 1.5                |
| Nebulizer gas flow rate (L min <sup>-1</sup> ) | 0.75               |
| Sample uptake rate (μL min <sup>-1</sup> )     | 100                |
| Nebulizer                                      | OneNeb®            |
| Spray chamber                                  | Cyclonic           |
| Number of replicates                           | 3                  |
| Viewing mode                                   | Axial              |
| Read time (s)                                  | 1                  |
| Element                                        | Emission line (nm) |
| Ba                                             | 455.403            |
| Be                                             | 313.042            |
| Cd                                             | 214.439            |
| Cr                                             | 267.716            |
| Cu                                             | 327.395            |
| Fe                                             | 238.204            |
| Hg                                             | 184.887            |
| Mn                                             | 257.610            |
| Ni                                             | 231.604            |
| Pb                                             | 220.353            |
| Zn                                             | 213.857            |

**Table S2.** Considered experimental factors and levels in the Plackett-Burman design.

| Factors                            | Level    |                  |
|------------------------------------|----------|------------------|
|                                    | Low (-1) | High (+1)        |
| Sample weight (g)                  | 8        | 10               |
| Sample pH                          | 4        | 8                |
| Amount of sorbent (mg)             | 5        | 10               |
| Dispersion mode                    | Vortex   | Ultrasonication  |
| Complexing agent concentration (%) | 0.5      | 1                |
| Ionic concentration (%)            | 0        | 2.5              |
| Eluent                             | HCl      | HNO <sub>3</sub> |
| Eluent concentration (M)           | 0.5      | 1                |
| Eluent volume (μL)                 | 200      | 500              |
| Extraction time (min)              | 1        | 3                |
| Elution time (min)                 | 1        | 3                |

**Table S3.** Considered experimental levels in CCD design.

| Factors            | Level      |     |     |     |            |
|--------------------|------------|-----|-----|-----|------------|
|                    | -α (-1.41) | -1  | 0   | +1  | +α (+1.41) |
| Sample pH          | 3.2        | 4   | 6   | 8   | 8.8        |
| Eluent volume (μL) | 138        | 200 | 350 | 500 | 562        |

**Table S4.** Optimum sample pH and eluent volume for each determined element.

| Factor             | Element |     |     |     |     |     |     |     |     |     |     |
|--------------------|---------|-----|-----|-----|-----|-----|-----|-----|-----|-----|-----|
|                    | Ba      | Be  | Cd  | Cr  | Cu  | Fe  | Hg  | Mn  | Ni  | Pb  | Zn  |
| Sample pH          | 6.9     | 8.3 | 8.4 | 7.3 | 7.0 | 7.0 | 8.8 | 8.2 | 7.0 | 7.8 | 8.5 |
| Eluent volume (μL) | 316     | 282 | 281 | 314 | 308 | 311 | 138 | 283 | 308 | 296 | 269 |

**Table S5.** Optimum experimental conditions for MDSPE.

| Factor                             | Value  |
|------------------------------------|--------|
| Sample weight (g)                  | 10     |
| Sample pH                          | 7.6    |
| Amount of sorbent (mg)             | 10     |
| Dispersion mode                    | Vortex |
| Complexing agent concentration (%) | 0.5    |
| Ionic concentration (%)            | 0      |
| Eluent                             | HCl    |
| Eluent concentration (M)           | 0.5    |
| Eluent volume ( $\mu$ L)           | 300    |
| Extraction time (min)              | 3      |
| Elution time (min)                 | 3      |

**Table S6.** Comparison of analytical figures of merit of the proposed method and other published methods.

| Sample               | Analytical technique | Sorbent                                                                    | Sample amount (mL or g) | Sorbent Amount (mg) | Analytes                                      | Extraction time (min) | LOD ( $\mu\text{g L}^{-1}$ )             | EF      | Ref.      |
|----------------------|----------------------|----------------------------------------------------------------------------|-------------------------|---------------------|-----------------------------------------------|-----------------------|------------------------------------------|---------|-----------|
| Water                | SPE-FAAS             | B. Subtilis - XAD-4                                                        | 250                     | 250                 | Cd and Cu                                     | 85                    | -                                        | 50      | 1         |
| Water                | MSPE-FAAS            | $\text{Fe}_3\text{O}_4/\text{SiO}_2/\text{L}$                              | 350                     | 130                 | Cd, Cu and Pb                                 | 10                    | 0.12-0.19                                | -       | 2         |
| Water                | SPE-FAAS             | XAD-2000                                                                   | 50-500                  | 250                 | Cd, Co, Cu, Fe, Mn, Ni, Pb, Zn                | 3-25                  | 0.15-0.45                                | 100     | 3         |
| Water                | MSPE-ETAAS           | Zeolite@ $\text{Fe}_3\text{O}_4$ @crown                                    | 25                      | 250                 | Cd                                            | 5                     | 0.0019                                   | -       | 4         |
| Water                | MDSPE-GFAAS          | $\text{Fe}_3\text{O}_4$ @graphene oxide nanospheres                        | 100                     | 20                  | Cd and Pb                                     | 6                     | 0.005-0.008                              | 200     | 5         |
| Environmental sample | MSPE-ICP-MS          | $\gamma$ -MPTMS-SCMNPs                                                     | 250                     | 50                  | Cd, Cu, Hg and Pb                             | 10                    | $24 \cdot 10^{-6}$ - $107 \cdot 10^{-6}$ | -       | 6         |
| Water                | MSPE-ICP OES         | Decanoic acid- $\text{Fe}_3\text{O}_4$                                     | 50                      | 12                  | Cd, Co, Cr, Ni, Pb and Zn                     | 5                     | 0.3-0.8                                  | 116-150 | 7         |
| Environmental sample | MSPE-ICP OES         | BSCMNPs                                                                    | 200                     | 100                 | Cr, Cu and Pb                                 | 10                    | 0.043-0.085                              | 87-96   | 8         |
| Water                | MSPE-ICP OES         | AMT-TMSPT-MNPs                                                             | 250                     | 50                  | Ag, Cd, Cu and Zn                             | 15                    | 0.11-0.13                                | 170-194 | 9         |
| Water                | UA-MSPE-ICP OES      | $\text{Fe}_3\text{O}_4$ @ $\text{MnO}_2$ , $\text{Al}_2\text{O}_3$ @AAPTMS | -                       | 10-100              | Cr                                            | 5-15                  | 0.02-0.05                                | 94      | 10        |
| Wastewater           | MDSPE-ICP OES        | ZIF67c_900_1                                                               | 10                      | 10                  | Ba, Be, Cd, Cr, Cu, Fe, Hg, Mn, Ni, Pb and Zn | 3                     | 0.073-1.3                                | 3.2-13  | This work |

- (1) Dogru, M.; Gul-Guven, R.; Erdogan, S. The Use of Bacillus Subtilis Immobilized on Amberlite XAD-4 as a New Biosorbent in Trace Metal Determination. *J. Hazard. Mater.* **2007**, *149*, 166–173. <https://doi.org/10.1016/j.jhazmat.2007.03.066>.
- (2) Bagheri, H.; Afkhami, A.; Saber-Tehrani, M.; Khoshsafar, H. Preparation and Characterization of Magnetic Nanocomposite of Schiff Base/Silica/Magnetite as a Preconcentration Phase for the Trace Determination of Heavy Metal Ions in Water, Food and Biological Samples Using Atomic Absorption Spectrometry. *Talanta* **2012**, *97*, 87–95. <https://doi.org/10.1016/j.talanta.2012.03.066>.
- (3) Bulut, V. N.; Gundogdu, A.; Duran, C.; Senturk, H. B.; Soylak, M.; Elci, L.; Tufekci, M. A Multi-Element Solid-Phase Extraction Method for Trace Metals Determination in Environmental Samples on Amberlite XAD-2000. *J. Hazard. Mater.* **2007**, *146*, 155–163. <https://doi.org/10.1016/j.jhazmat.2006.12.013>.
- (4) Naghizadeh, M.; Taher, M. A.; Behzadi, M.; Moghaddam, F. H. Preparation a Novel Magnetic Natural Nano Zeolite for Preconcentration of Cadmium and Its Determination by ETAAS. *Environ. Nanotechnology, Monit. Manag.* **2017**, *8*, 261–267. <https://doi.org/10.1016/j.enmm.2017.10.001>.
- (5) Montoro-Leal, P.; García-Mesa, J. C.; Siles Cordero, M. T.; López Guerrero, M. M.; Vereda Alonso, E. Magnetic Dispersive Solid Phase Extraction for Simultaneous Enrichment of Cadmium and Lead in Environmental Water Samples. *Microchem. J.* **2020**, *155*, 104796. <https://doi.org/10.1016/j.microc.2020.104796>.
- (6) Huang, C.; Hu, B. Silica-Coated Magnetic Nanoparticles Modified with  $\gamma$ -Mercaptopropyltrimethoxysilane for Fast and Selective Solid Phase Extraction of Trace Amounts of Cd, Cu, Hg, and Pb in Environmental and Biological Samples Prior to Their Determination by Inductively Co. *Spectrochim. Acta - Part B At. Spectrosc.* **2008**, *63*, 437–444. <https://doi.org/10.1016/j.sab.2007.12.010>.
- (7) Faraji, M.; Yamini, Y.; Saleh, A.; Rezaee, M.; Ghambarian, M.; Hassani, R. A Nanoparticle-Based Solid-Phase Extraction Procedure Followed by Flow Injection Inductively Coupled Plasma-Optical Emission Spectrometry to Determine Some Heavy Metal Ions in Water Samples. *Anal. Chim. Acta* **2010**, *659*, 172–177. <https://doi.org/10.1016/j.aca.2009.11.053>.
- (8) Suleiman, J. S.; Hu, B.; Peng, H.; Huang, C. Separation/Preconcentration of



- Trace Amounts of Cr, Cu and Pb in Environmental Samples by Magnetic Solid-Phase Extraction with Bismuthiol-II-Immobilized Magnetic Nanoparticles and Their Determination by ICP-OES. *Talanta* **2009**, 77, 1579–1583. <https://doi.org/10.1016/j.talanta.2008.09.049>.
- (9) Mashhadizadeh, M. H.; Karami, Z. Solid Phase Extraction of Trace Amounts of Ag, Cd, Cu, and Zn in Environmental Samples Using Magnetic Nanoparticles Coated by 3-(Trimethoxysilyl)-1-Propanthiol and Modified with 2-Amino-5-Mercapto-1,3,4-Thiadiazole and Their Determination by ICP-OES. *J. Hazard. Mater.* **2011**, 190, 1023–1029. <https://doi.org/10.1016/j.jhazmat.2011.04.051>.
- (10) Munonde, T. S.; Maxakato, N. W.; Nomngongo, P. N. Preconcentration and Speciation of Chromium Species Using ICP-OES after Ultrasound-Assisted Magnetic Solid Phase Extraction with an Amino-Modified Magnetic Nanocomposite Prepared from Fe<sub>3</sub>O<sub>4</sub>, MnO<sub>2</sub> and Al<sub>2</sub>O<sub>3</sub>. *Microchim. Acta* **2017**, 184, 1223–1232. <https://doi.org/10.1007/s00604-017-2126-2>.
